# Supplementary material
Source: Research Square preprint supplement (doi:10.21203/rs.3.rs-9997871/v1)
Supplement: Supplementary file 1 [file 3eb64e62317bf8e076e8c289.docx]

**Who Controls the Algorithm? Data Sovereignty, Digital Extractivism,**

**and AI Governance Gaps in Africa**

***Supplementary Materials***

Samuel Okediji · Gansuvun Oyinkansola

*MA Cultural Policy and Management Studies, University of Arts Belgrade UNESCO Chair*

*LLB LAW, LAGOS STATE UNIVERSITY OJO*

**This document contains:**

Table 3 — Supplementary Enforcement Indicators by Country

Supplementary Material A — AAGRI Dimension-Level Scoring Documentation (Table S1)

Supplementary Material B — Sensitivity Analysis Results (Table S2)

**Table 3: Supplementary Enforcement Indicators by Country**

Enforcement indicator data for all four case-study countries drawn from IAPP (2024), Tech Hive Advisory (2024), CIPESA (2024), and African Researchers Magazine (2025). Rwanda data is limited by press freedom constraints on independent reporting.

| **Indicator** | **Nigeria** | **Kenya** | **Rwanda** | **South Africa** |
| --- | --- | --- | --- | --- |
| **DPA Establishment Year** | 2023 | 2019 | 2021 | 2021 |
| **AI-Specific Enacted Legislation** | None | None | Partial (National AI Policy) | None |
| **Documented Major Enforcement Actions (2022–2024)** | 1 (Meta $220M, 2024) | Worldcoin suspension; KES 14M+ fines | Limited public record | Multiple notices and fines |
| **Dedicated AI Audit Unit** | No | No | No | Partial (IOCO) |
| **Documented Breach Response** | NIMC: no action as of mid-2024 | Worldcoin: suspended pending review | N/A (press freedom constrained) | Notices and fines issued |
| **ECS Score (AAGRI D2)** | 2.5/10 | 4.0/10 | 4.5/10 | 7.0/10 |

***Note:*** *Rwanda enforcement data limited by press freedom constraints on independent reporting. All other figures sourced from IAPP (2024), Tech Hive Advisory (2024), and CIPESA (2024).*

**Supplementary Material A**

**AAGRI Dimension-Level Scoring Documentation**

This supplementary material provides the full dimension-level scoring documentation for the Africa AI Governance Readiness Index (AAGRI), including the primary evidence supporting each country-dimension score, to enable independent replication and critique of the scoring methodology.

Scoring Schema: 0–3 = Critical deficiency (legislation absent or unenforced; institution non-functional or non-existent). 4–6 = Partial development (legislation exists but enforcement limited; institution operational but under-resourced or constrained). 7–10 = Functional adequacy (legislation comprehensive and contextually appropriate; enforcement documented and credible; institution demonstrably independent). Scores at band boundaries resolved by enforcement action criterion: a score of 7 or above requires at least one documented enforcement action within the preceding three years producing a measurable outcome.

**Table S1: AAGRI Dimension-Level Scoring Evidence**

| **Country / Dimension** | **Score** | **Primary Evidence Supporting Score** | **Key Sources** |
| --- | --- | --- | --- |
| **Nigeria D1** | 6.5 | NDPA 2023 enacted with GDPR-derived rights architecture; comprehensive scope but no AI-specific provisions | *Nigeria DPA 2023* |
| **Nigeria D2** | 2.5 | No AI Audit Unit; NIMC breach with no documented enforcement response; lawsuit filed over DPA underfunding; single major enforcement action (Meta $220M, 2024, post-scoring) | *IAPP 2024; Okolo 2024* |
| **Nigeria D3** | 1.5 | No enacted AI-specific legislation or mandatory AIA requirement; no AI risk classification framework; largest fintech market on continent operating without algorithmic accountability provisions | *Gwagwa et al. 2024* |
| **Nigeria D4** | 2.0 | No multilingual data rights communication programme; NDPC online complaint mechanism not optimised for low-bandwidth connectivity; Chege (2026) documents critically low awareness | *Chege 2026* |
| **Nigeria D5** | 3.0 | NDPC leadership appointed by executive without legislative confirmation; no documented civil society nomination process; political exposure documented | *IAPP 2024* |
| **Nigeria D6** | 3.5 | Malabo Convention not ratified as of 2024; partial engagement with AU Continental AI Strategy; limited participation in global AI governance forums | *AU 2024; Tech Gov 2024* |
| **Kenya D1** | 6.0 | DPA 2019 comprehensive for its time; established data subject rights and DPA structure; pre-AI vintage limits AI-specific applicability | *Republic of Kenya 2019* |
| **Kenya D2** | 4.0 | Worldcoin suspension documented; KES 14M+ penalties imposed; ODPC technically under-resourced relative to mandate; no dedicated AI audit staff | *IAPP 2024* |
| **Kenya D3** | 2.5 | No AI-specific legislation has been enacted; digital lending sector operating without AIA requirements despite documented algorithmic bias against women and rural borrowers | *Gwagwa & Hilliard 2024* |
| **Kenya D4** | 3.0 | Swahili-medium communications improving; digital literacy gap documented especially in rural areas; Huduma Namba controversy showed limited citizen awareness of biometric rights | *Chege 2026; CIPESA 2024* |
| **Kenya D5** | 4.5 | ODPC operates with reasonable day-to-day independence; appointment process more transparent than Nigeria; some documented commercial pressure on regulatory positions | *IAPP 2024* |
| **Rwanda D3** | 5.5 | National AI Policy addresses AI-specific governance questions beyond general data protection; highest AI-specific score in sample; implementation accountability limited by D5 constraints | *Gwagwa et al. 2024* |
| **Rwanda D5** | 3.0 | Freedom House (2024) documents constraints on press freedom, civil society, and judicial autonomy; RISA functions within state security architecture; regulatory independence from political authority structurally limited | *Freedom House 2024* |
| **South Africa D1** | 8.5 | POPIA fully operational since July 2021; most comprehensive enacted data protection framework on continent; constitutional privacy architecture; strong judicial enforcement tradition | *Republic of SA 2013* |
| **South Africa D2** | 7.0 | IOCO has issued multiple enforcement notices against government and private entities; documented fines imposed; enforcement track record established; partial AI audit capacity in development | *IAPP 2024; Njanja 2022* |
| **South Africa D3** | 3.5 | No AI-specific enacted legislation; facial recognition deployed in multiple cities without legislative mandate or demographic bias assessment; POPIA Section 71 on automated decisions limited in practical enforceability | *Buolamwini & Gebru 2018* |
| **South Africa D5** | 7.5 | Constitutional independence of Information Regulator strongest in sample; appointment process involves parliamentary oversight; documented resistance to executive interference | *IAPP 2024* |

***Note:*** *Dimensions not listed follow the same evidentiary logic. Scores at band boundaries (e.g. 4 vs 5, 6 vs 7) were resolved by the enforcement action criterion: a score of 7 or above requires at least one documented enforcement action within the preceding three years producing a measurable outcome (fine, suspension, or corrective order). All source documents are publicly available and fully cited in the main manuscript References section.*

**Supplementary Material B**

**Sensitivity Analysis Results**

Three alternative weighting scenarios were tested alongside the base case of equal weighting to assess ordinal ranking stability. Scenario A applied double weight to D2 (Enforcement Capacity) and D3 (AI-Specific Regulatory Readiness). Scenario B applied double weight to D1 (Legislative Framework) and D6 (International Alignment). Scenario C preserved equal weighting (identical to base case).

**Table S2: AAGRI Composite Scores Under Alternative Weighting Scenarios**

| **Scenario** | **Nigeria** | **Kenya** | **Rwanda** | **South Africa** |
| --- | --- | --- | --- | --- |
| **Base (equal weights)** | 31.7% | 40.8% | 43.3% | 61.7% |
| **Scenario A (D2+D3 double weighted)** | 28.8% | 38.8% | 45.0% | 59.4% |
| **Scenario B (D1+D6 double weighted)** | 36.3% | 43.8% | 45.6% | 64.4% |
| **Ordinal rank (all scenarios)** | **4th** | **3rd** | **2nd** | **1st** |

***Note:*** *Under Scenario B the Rwanda–Kenya margin narrows to 1.9 percentage points (Rwanda 45.6%, Kenya 43.8%), the closest adjacent pairing in any scenario, but the ordinal ranking does not invert and both countries remain within the Developing readiness band. The ordinal ranking South Africa > Rwanda > Kenya > Nigeria is stable across all weighting scenarios. Score differentials between adjacent countries narrowed or widened by a maximum of approximately 4.6 percentage points, and no country crossed a readiness band boundary.*

**Readiness Band Key**

Critical: 0–35% | Developing: 36–55% | Transitional: 56–70% | Functional: 71–85% | Advanced: 86–100%
